# Supplementary material for: Sensitivity of simulated CO 2 concentration to sub-annual variations in fossil fuel CO 2 emissions
Source: Copernicus journal article supplement (doi:10.5194/acp-16-1907-2016), 2016-02-19
Supplement: Supplementary file 1 [file acp-16-1907-2016-supplement.pdf]

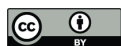

*Supplement of*

## **Sensitivity of simulated CO<sub>2</sub> concentration to sub-annual variations in fossil fuel CO<sub>2</sub> emissions**

**Xia Zhang et al.**

*Correspondence to:* Xia Zhang (tyouxia@gmail.com)

The copyright of individual parts of the supplement might differ from the CC-BY 3.0 licence.

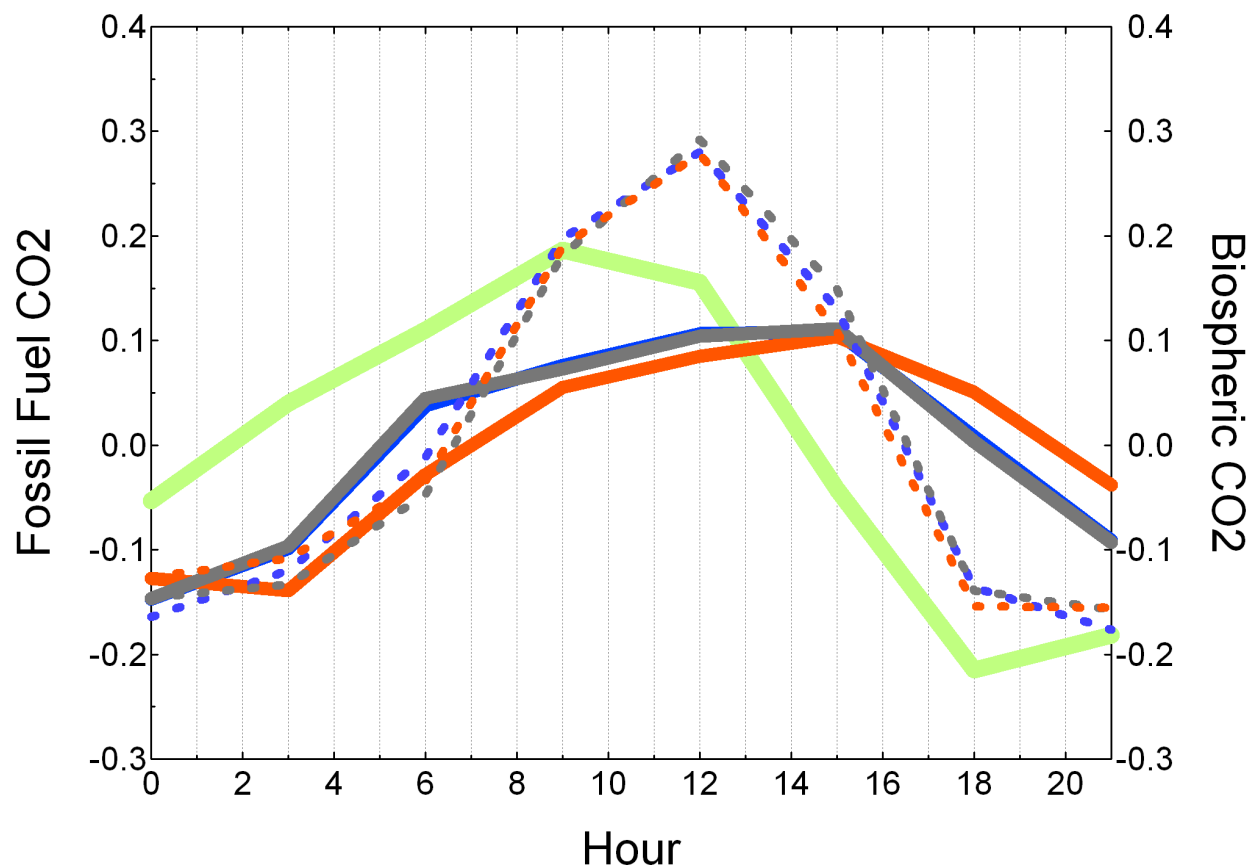

**Figure S1** Normalized diurnal cycle of FFCO<sub>2</sub> emissions over three large source regions (US: solid gray, Western Europe: solid blue; China: solid orange) and the normalized diurnal cycle of biospheric fluxes for the tropics and northern middle latitude (20°S~50°N) (solid green). Also plotted are the normalized diurnal cycle of planetary boundary layer height for the three LSRs (US: dashed gray; Western Europe: dashed blue; China: dashed orange) and that for the region of biospheric fluxes (dashed green).

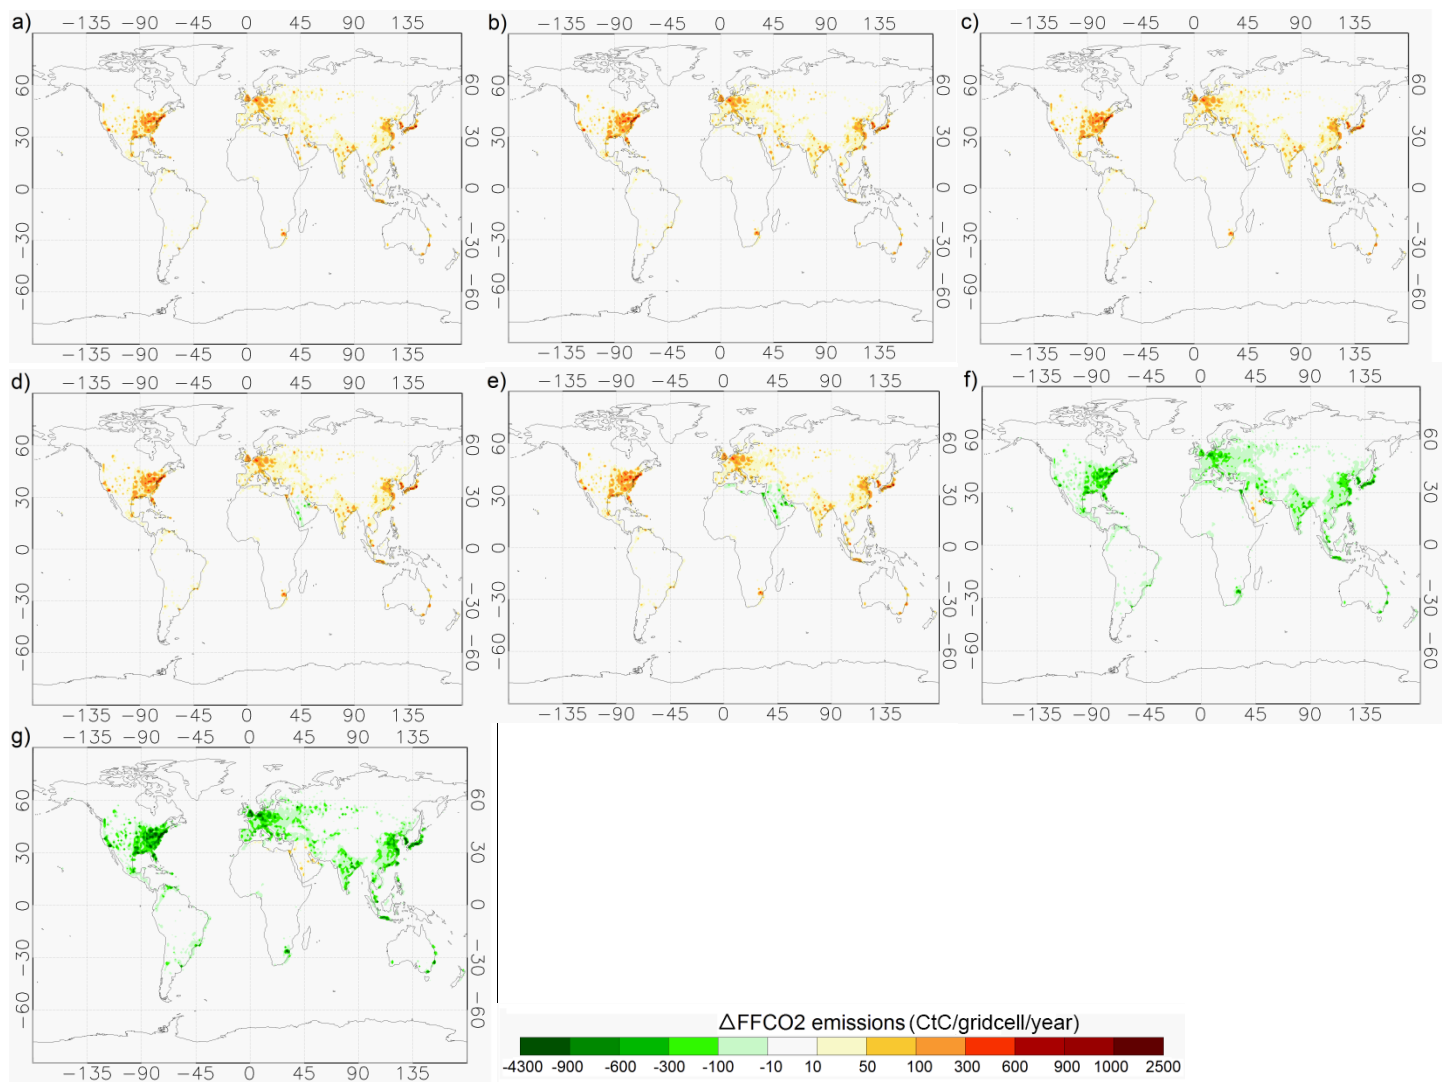

**Figure S2** Daily FFCO<sub>2</sub> emissions for each day of the week: a) for Monday, b) for Tuesday, c) for Wednesday, d) for Thursday, e) for Friday, f) for Saturday and g) for Sunday.

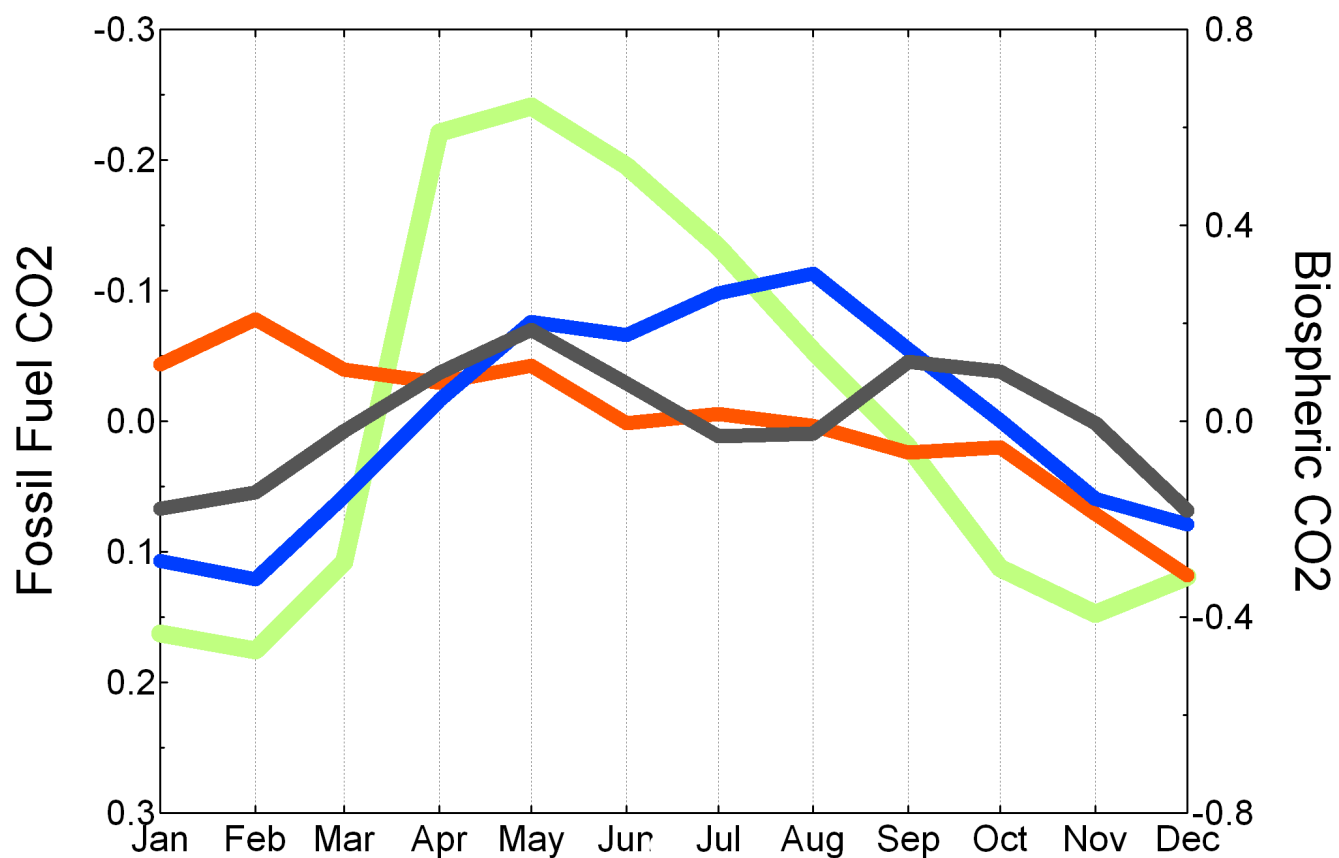

**Figure S3** Normalized monthly FFCO<sub>2</sub> emissions for three large source regions (US: solid gray, Western Europe: solid blue and China: solid orange) and normalized monthly biospheric fluxes for the tropics and northern middle latitude (20°S~ 50°N) (solid green).

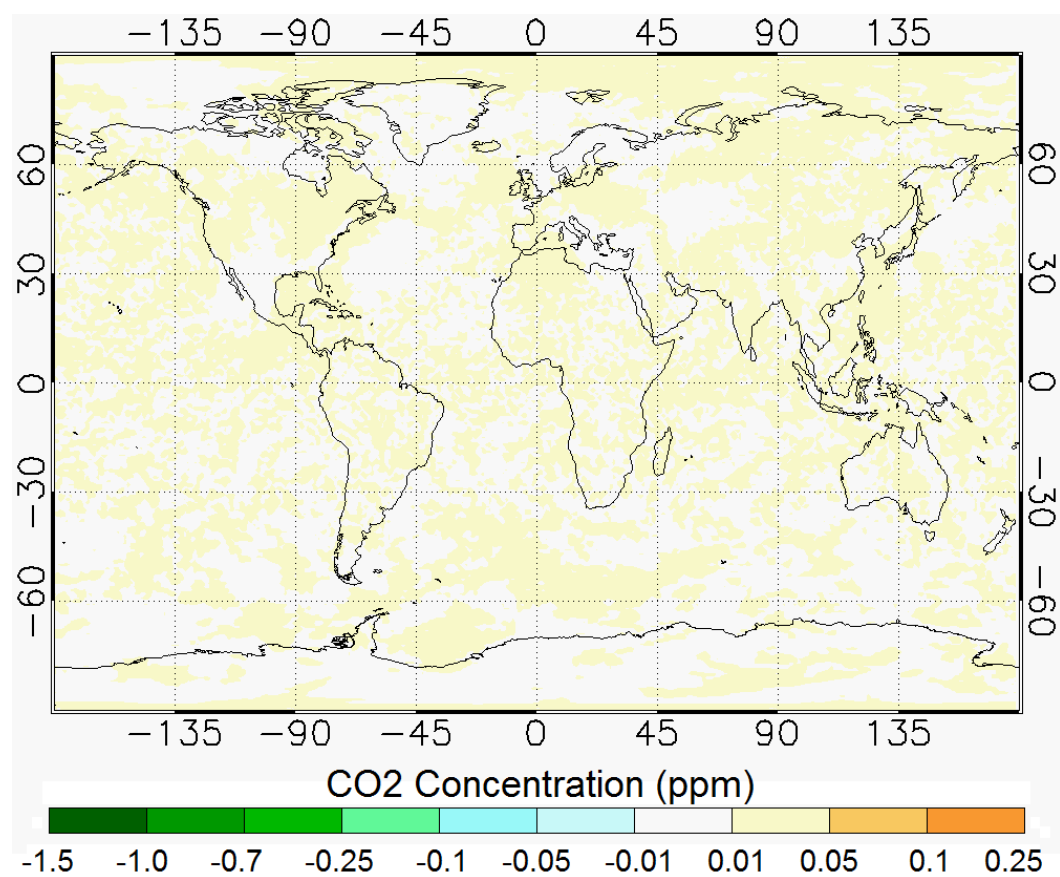

**Figure S4** Annual mean surface FFCO<sub>2</sub> concentration difference between the WCE and FE FFCO<sub>2</sub> emission fields.

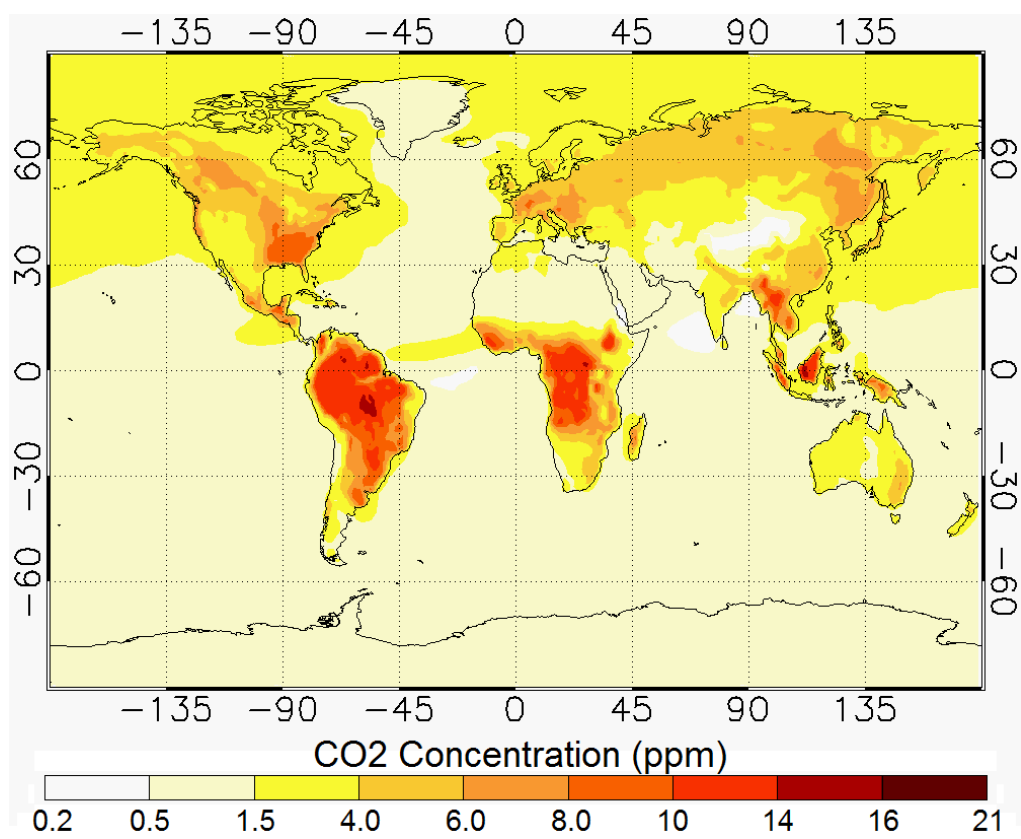

**Figure S5** Annual mean surface CO<sub>2</sub> concentration difference between the biospheric fluxes and the 350 ppmv initial condition.

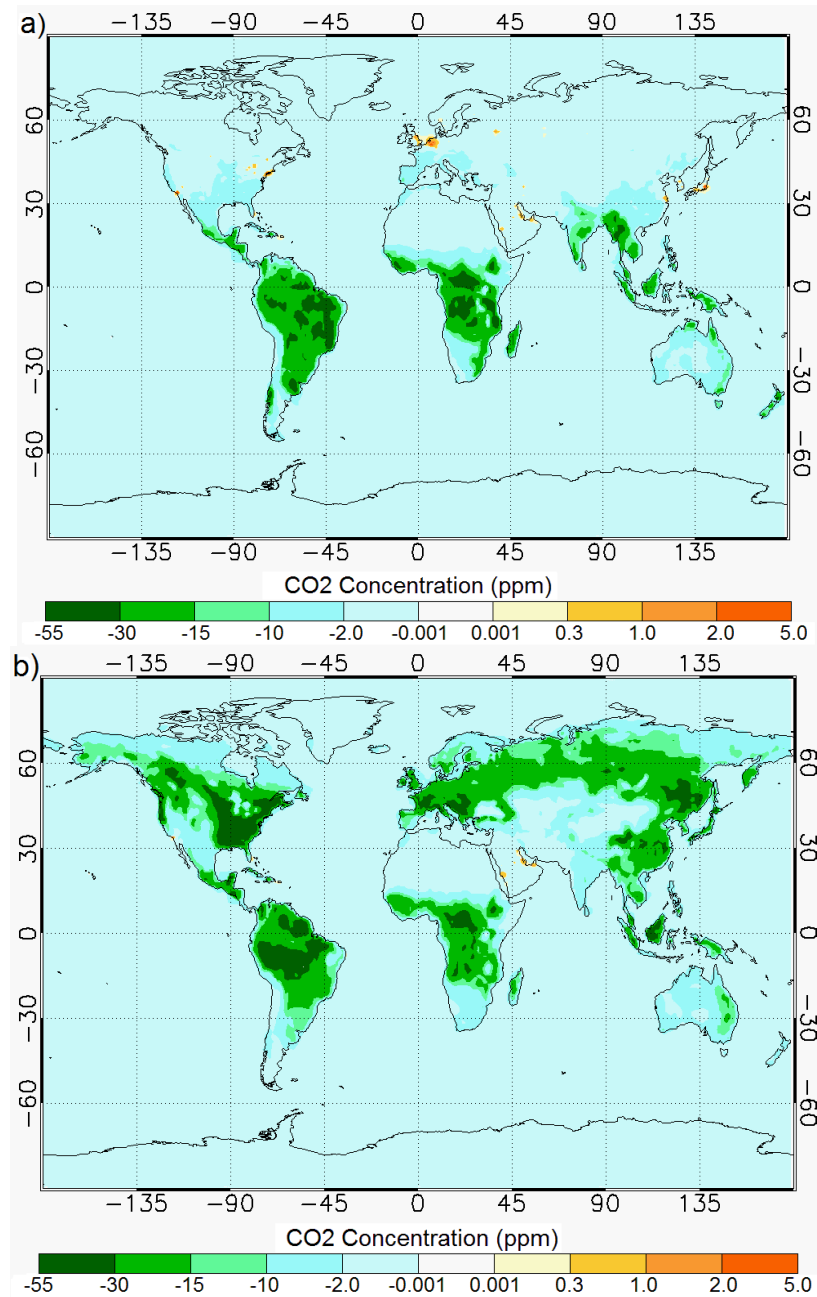

**Figure S6** Difference in diurnal peak-to-peak amplitude of surface FFCO<sub>2</sub> concentration between diurnal FFCO<sub>2</sub> simulation and biospheric simulation (FFCO<sub>2</sub> minus biospheric CO<sub>2</sub>). In the figure, a) for January and b) for July.

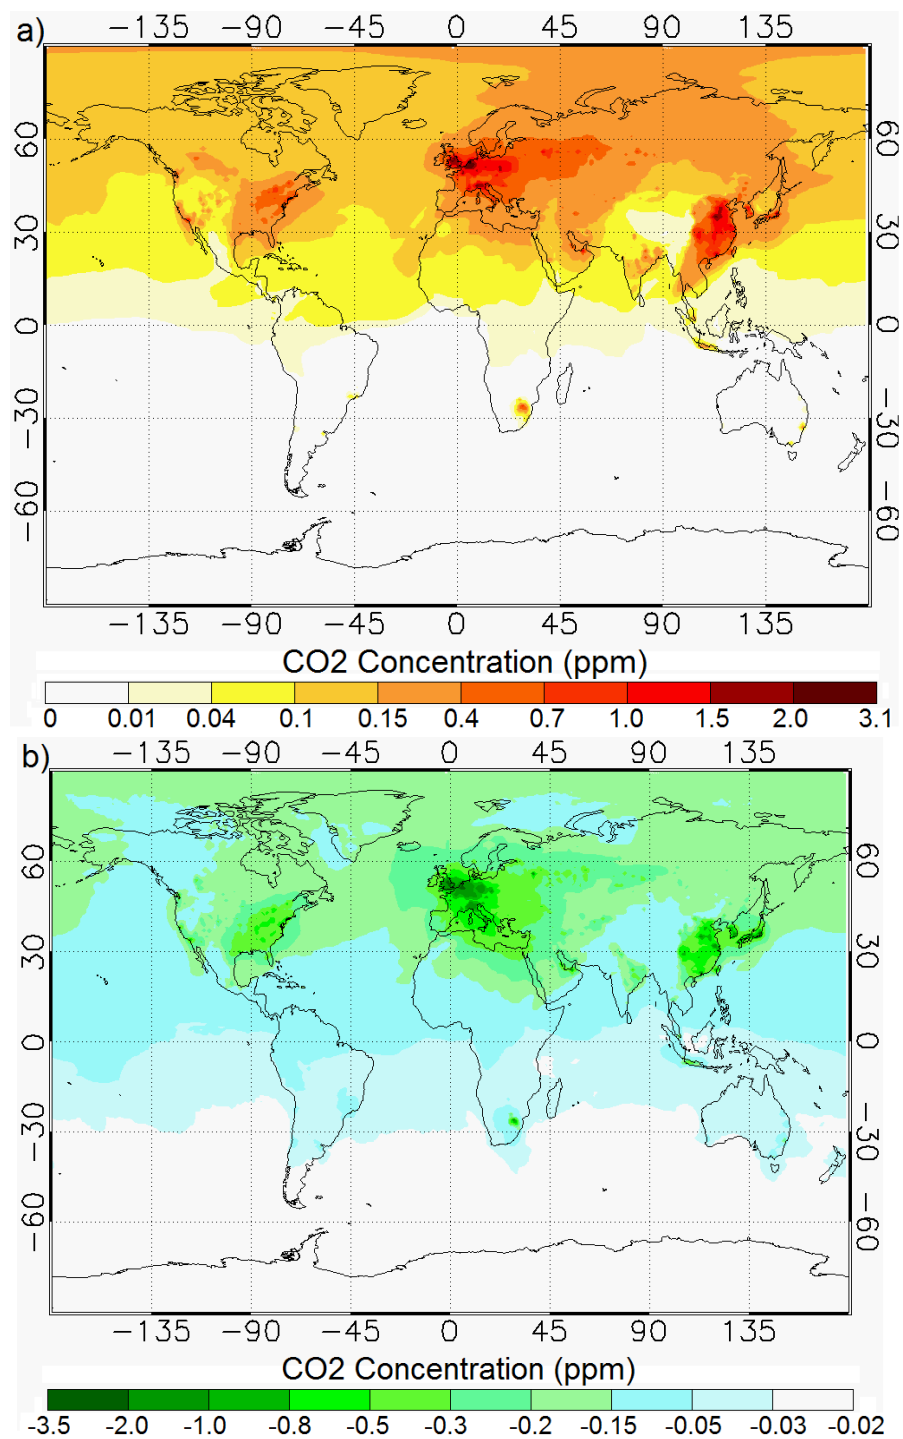

**Figure S7** Maximum and minimum of seasonal surface FFCO<sub>2</sub> concentration difference between monthly cycle emissions (MCE) and flat emissions (FE) (MCE minus FE). a) seasonal maximum; b) seasonal minimum.



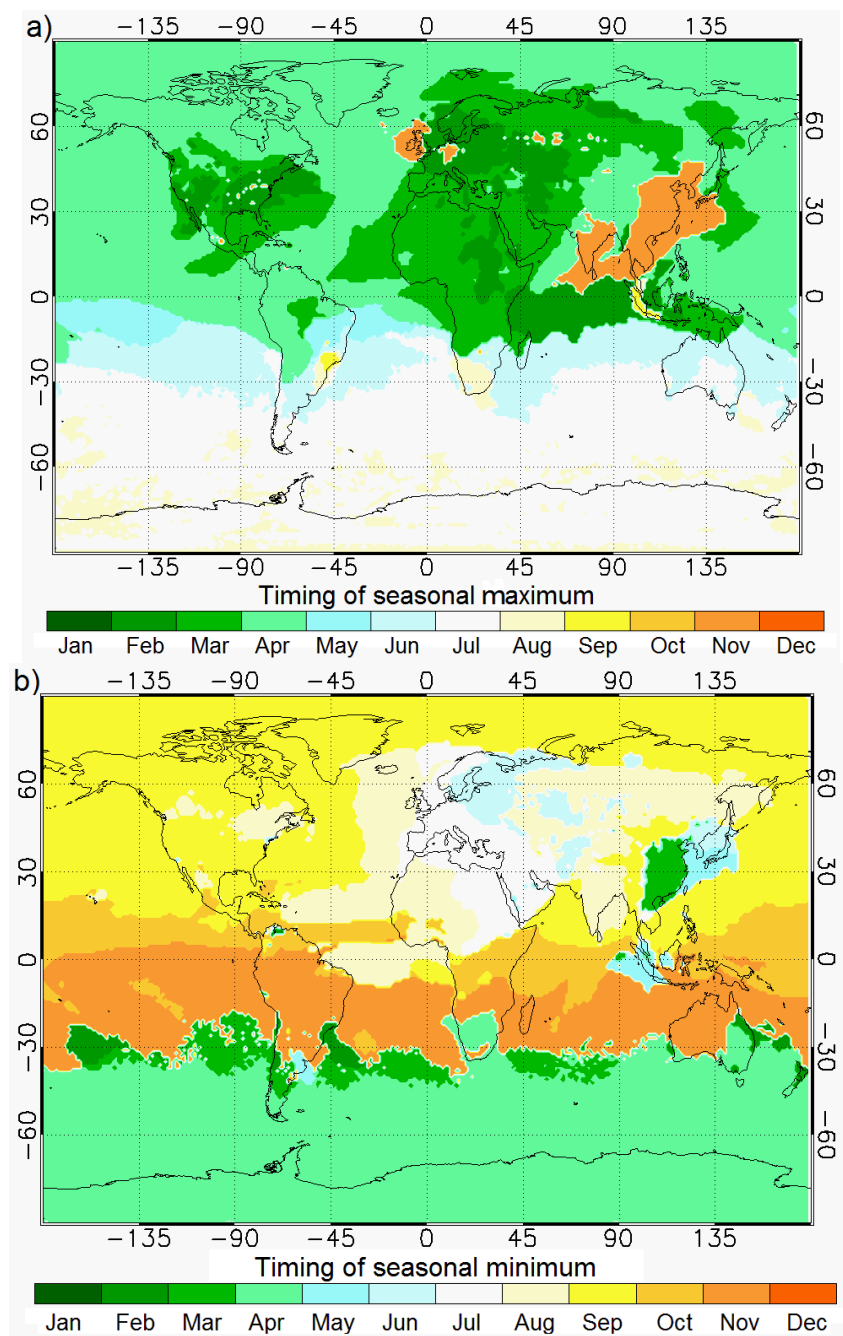

**Figure S8** Timing of seasonal maximum and minimum of surface FFCO<sub>2</sub> concentration difference between monthly FFCO<sub>2</sub> emissions (MCE) and flat FFCO<sub>2</sub> emissions (FE). In the figure, a) maximum; b) minimum.

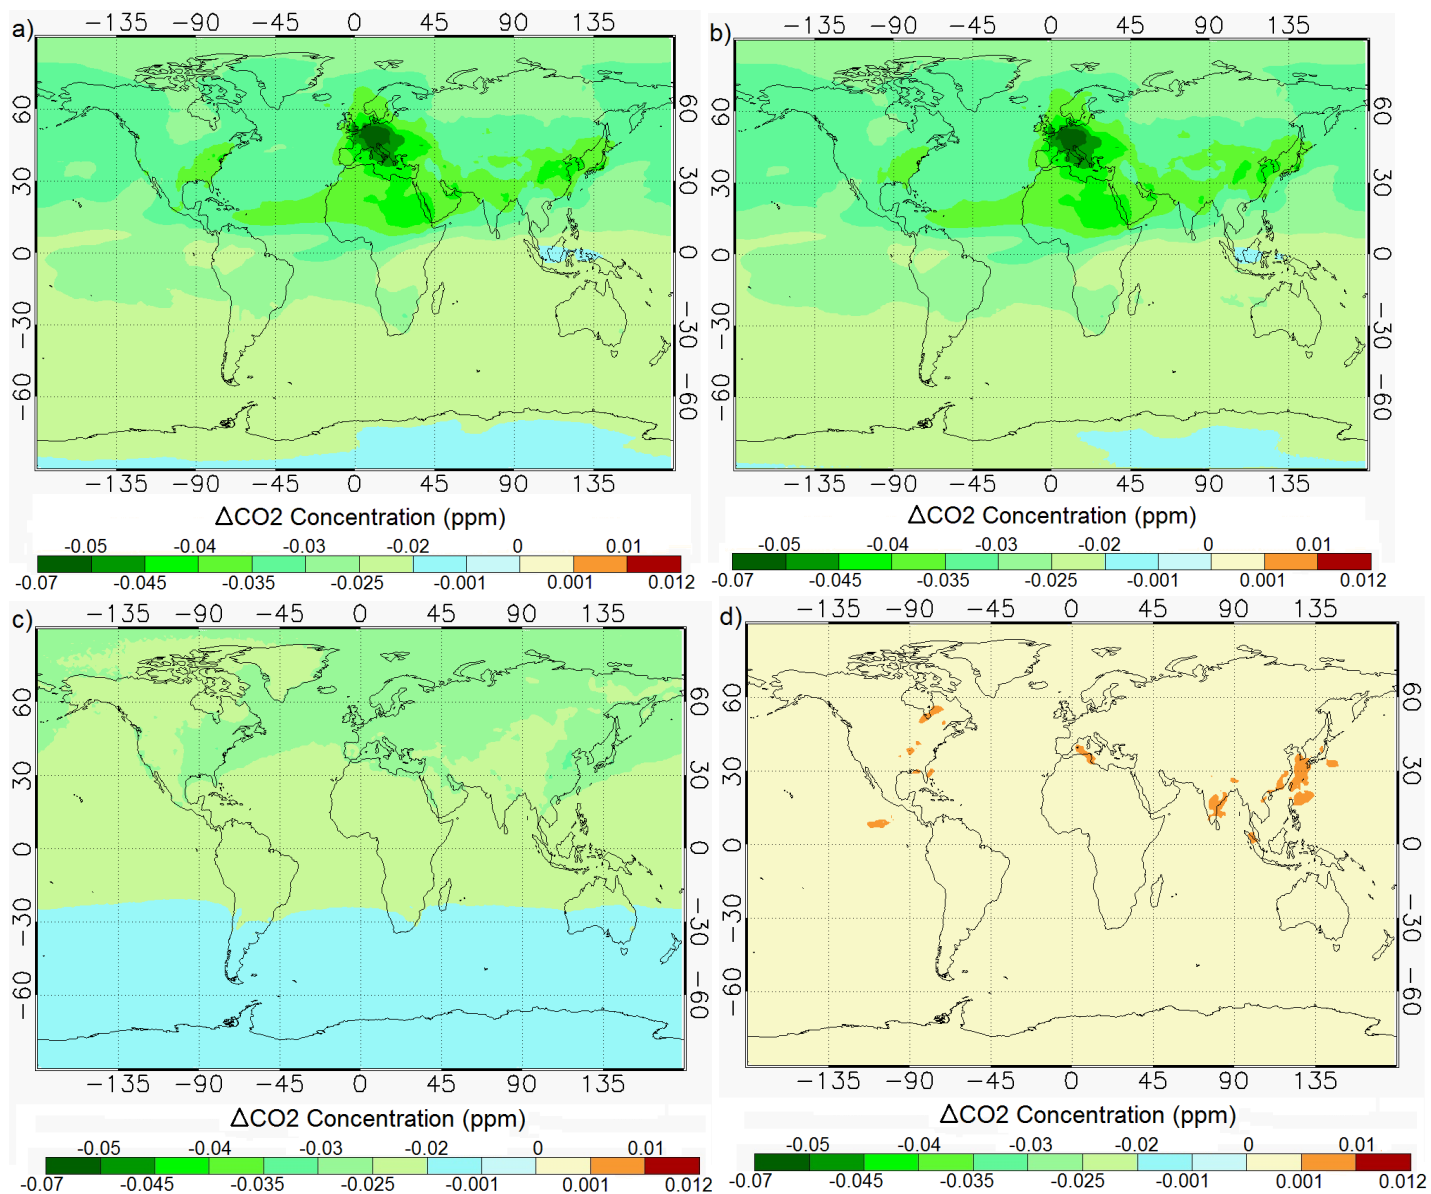

**Figure S9** Column-averaged annual mean FFCO<sub>2</sub> concentration difference between cyclic FFCO<sub>2</sub> emissions and flat emissions. In the figure, a) for all time cycle emissions (ACE); b) for monthly emissions (MCE); c) for diurnal cycle emissions (DCE) and d) for weekly cycle emissions (WCE).
